# Supplementary material for: Three-dimensional fabrication of heterogeneous microstructures using soft membrane deformation and optofluidic maskless lithography
Source: Royal Society of Chemistry journal article supplement (doi:10.1039/b819999j), 2009-01-01
Supplement: b819999j.pdf [file b819999j.pdf]

**Supplementary Information for:**

**Three-Dimensional Fabrication of Heterogeneous Microstructures using Soft Membrane Deformation and Optofluidic Maskless Lithography**

Seung Ah Lee, Su Eun Chung, Wook Park, Sung Hoon Lee and Sunghoon Kwon

*Seoul National University, Department of Electrical Engineering and Computer Sciences,*

Fig. S1. Schematic diagram of two-layered microfluidic channel fabrications.

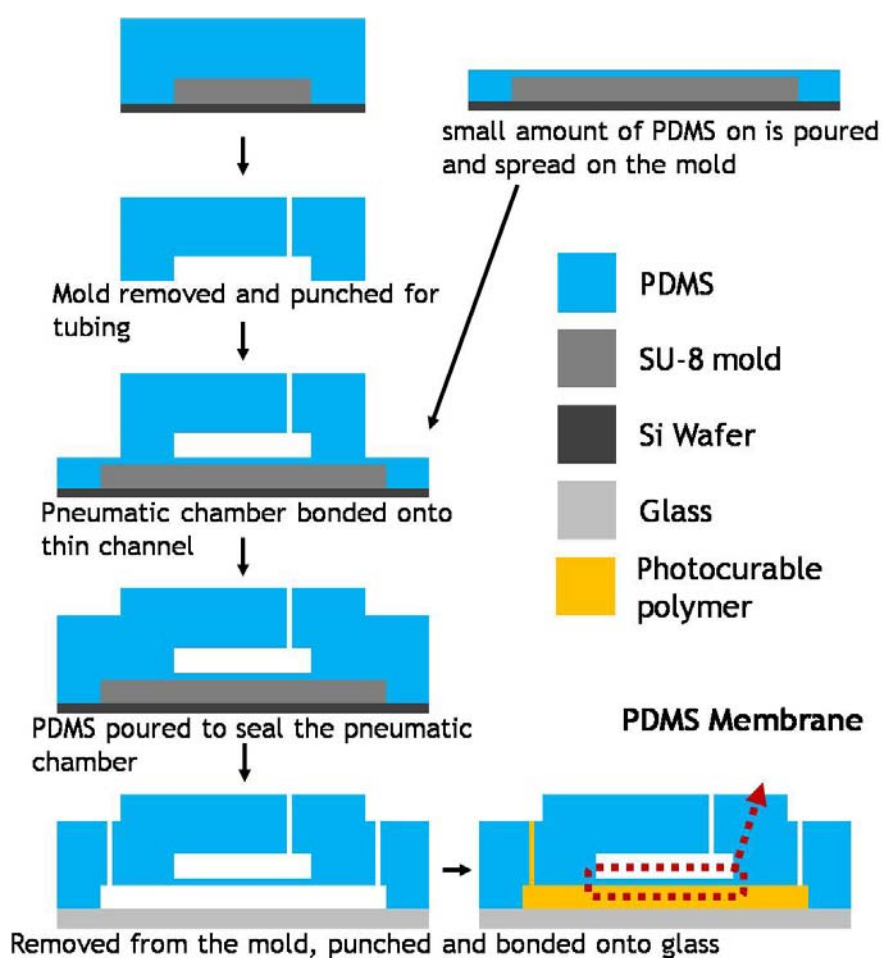

Fig. S2. Confocal microscope images of fluorescent bead-embedded hydrogel structures (Fig. 4B)

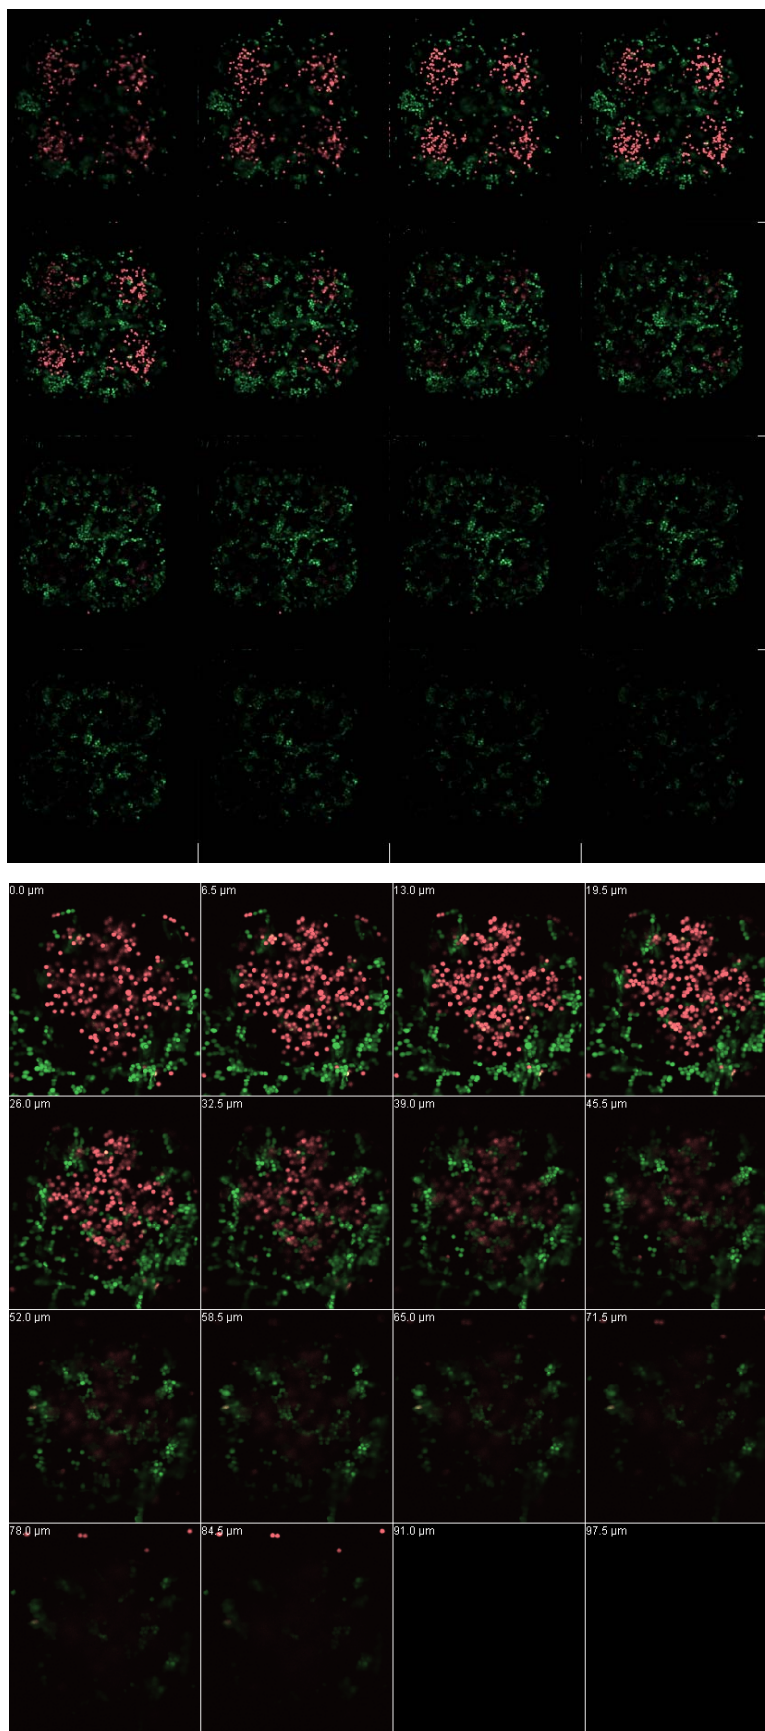

### S1. Calculation model for the membrane curvature

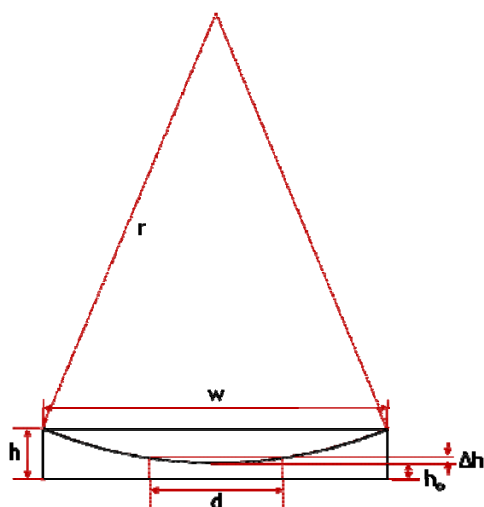

Fig. S3. Simple geometrical model for calculation of membrane curvature in the fabrication area.

with the following equation.

$$\Delta h = r \left( 1 - \sqrt{1 - \left( \frac{d}{2r} \right)^2} \right)$$

The value of  $d$  that is tolerable to certain  $\Delta h$  can be obtained as below.

$$d = 2r \sqrt{1 - \left( 1 - \frac{\Delta h}{r} \right)^2}$$

Fixing the channel height,  $h = 100\mu\text{m}$ ,  $\Delta h$  of the membrane according to  $w$ ,  $d$  and  $h_0$  can be obtained (Figure S4).

The maximum value of  $d$  is determined by the field of view of the optical systems, which was approximately  $1\text{mm}$  to ensure uniform UV intensity and no image distortion. Toughest condition in all experiments was to have  $\Delta h < 2\mu\text{m}$  at  $h_0 = 10\mu\text{m}$  and  $d = 800\mu\text{m}$ , which required a large channel with  $w = 5.5\text{mm}$ . In normal conditions, we used  $w = 2\text{mm}$  channel, which provides  $2\mu\text{m}$   $\Delta h$  tolerance at  $h_0 = 20\mu\text{m}$  within  $d = 300\mu\text{m}$  area.

To determine the width of the channel,  $w$ , to ensure flat membrane in the fabrication area  $d$ , we used simple model as given in Fig.S3. Since the aspect ratio ( $w/h$ ) of the underlying channel is very large, we assumed that the cross-section of the deformed membrane forms an arc with a curvature radius  $r$ . The median vertical position of the membrane,  $h_0$ , corresponds to the desired thickness of the fabricated layer. We defined  $\Delta h$  as the maximum height variation within the fabrication area  $d$  at  $h_0$ . Considering the size of the structure, we defined  $\Delta h < 2\mu\text{m}$  as the tolerable flatness of the membrane surface at the desired value of  $d$  and  $h_0$ .

From fig. S3, the curvature radius of the membrane can be determined as

$$r = \frac{\left( \frac{w}{2} \right)^2 + (h - h_0)^2}{2(h - h_0)}$$

Using the obtained radius value,  $\Delta h$  can be calculated

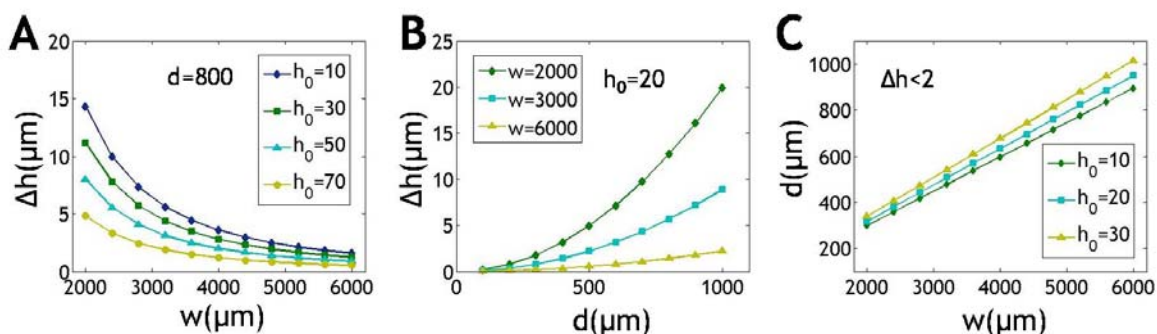

Fig. S4. (a)  $\Delta h$  variation within the  $800\mu\text{m}$  fabrication area with the channel width  $w$  and membrane height  $h_0$ . (b)  $\Delta h$  variation along the fabrication area when the membrane height is  $20\mu\text{m}$ . (c) Width of flat fabrication area according to the channel width while fixing  $\Delta h$  to  $2\mu\text{m}$ .
